# Supplementary material for: Absolute lymphocyte count after BCMA CAR-T therapy is a predictor of response and outcomes in relapsed multiple myeloma
Source: PubMed Central journal article supplement — Blood Adv. 2024 May 24;8(15):3859–69. doi: 10.1182/bloodadvances.2023012470 (PMC11321283; doi:10.1182/bloodadvances.2023012470), 2024-05-24

# Supplementary Tables

**Supplemental Table S1:** Panel of antibodies used in peripheral blood flow cytometry.

| Antibody/recombinant protein | Fluorochrome        | Catalogue number | Vendor                         |
|------------------------------|---------------------|------------------|--------------------------------|
| BCMA/TNFRSF17 Fc             | Alexa Fluor®<br>488 | AFG193           | R&D systems                    |
| CD2                          | BV421               | 562667           | BD Horizon                     |
| CD3                          | Pe-Cy7              | 340948           | BD Biosciences                 |
| CD5                          | PerCP-Cy5-5         | 341099           | BD Biosciences                 |
| CD7                          | APC                 | 17-0079-42       | Invitrogen                     |
| CD8                          | APC-H7              | 6607102          | Beckman-<br>Coulter/immunotech |
| CD57                         | PE                  | 560844           | BD Pharmingen                  |

**Supplemental Table S2** Absolute Lymphocyte Count (ALC) variables after BCMA CAR-T treatment.

| Variable                                                                      | Overall<br>N = 156 <sup>1</sup> | Ide-cel<br>N = 65 <sup>1</sup> | Cilta-cel<br>N = 91 <sup>1</sup> | p-value <sup>2</sup> |
|-------------------------------------------------------------------------------|---------------------------------|--------------------------------|----------------------------------|----------------------|
| <b>Maximum ALC (cel/uL)</b>                                                   | 1.26<br>(0.65 - 2.7)            | 0.8<br>(0.5 - 1.1)             | 2<br>(0.9 - 4.4)                 | <0.001               |
| <b>Absolute Lymphocytosis (ALC<sub>max</sub> &gt;3.74 x10<sup>3</sup>/uL)</b> |                                 |                                |                                  |                      |
| Had absolute lymphocytosis                                                    | 29 (19)                         | 0 (0.0)                        | 29 (32)                          | <0.001               |
| No absolute lymphocytosis                                                     | 127 (81)                        | 65 (100)                       | 62 (68)                          |                      |
| <b>ALC<sub>max</sub> &gt;1.0 x10<sup>3</sup>/uL</b>                           |                                 |                                |                                  |                      |
| ALC <sub>max</sub> ≤ 1.0 x 10 <sup>3</sup> cel/uL                             | 70 (45)                         | 46 (71)                        | 24 (26)                          | <0.001               |
| ALC <sub>max</sub> > 1.0 x 10 <sup>3</sup> cel/uL                             | 86 (55)                         | 19 (29)                        | 66 (74)                          |                      |
| <b>ALC<sub>max</sub> within above lower limit range (&gt;1.17 cel/uL)</b>     |                                 |                                |                                  |                      |
| No Normal ALC during day 0-15                                                 | 76 (49)                         | 49 (75)                        | 27 (30)                          | <0.001               |
| Normal ALC during day 0-15                                                    | 80 (51)                         | 16 (25)                        | 64 (70)                          |                      |
| <b>Absolute ALC Change</b>                                                    | 1.28<br>(0.6 - 2.9)             | 0.77<br>(0.4 - 1.1)            | 2.1<br>(0.9 - 4.4)               | <0.001               |

Absolute Lymphocyte Count (ALC), ALC<sub>max</sub> (maximum ALC during day 0-15), interquartile range (IQR)

<sup>1</sup>Median (IQR); n (%)

<sup>2</sup>Wilcoxon rank sum test; Pearson's Chi-squared test

Univariable Regression - Max Absolute Lymphocyte Count

| Characteristic                                    | Cilta-cel |           |                     |              | Ide-cel |           |                     |              |
|---------------------------------------------------|-----------|-----------|---------------------|--------------|---------|-----------|---------------------|--------------|
|                                                   | N         | exp(Beta) | 95% CI <sup>1</sup> | p-value      | N       | exp(Beta) | 95% CI <sup>1</sup> | p-value      |
| <b>Age at CAR-T Infusion</b>                      | 91        | 1.01      | 0.94 to 1.09        | 0.70         | 65      | 1.01      | 1.00 to 1.02        | 0.14         |
| <b>CRS after CAR-T</b>                            | 91        |           |                     | <b>0.013</b> | 65      |           |                     | 0.10         |
| No                                                |           | —         | —                   |              |         | —         | —                   |              |
| Yes                                               |           | 12.6      | 1.69 to 93.0        |              |         | 1.38      | 0.94 to 2.03        |              |
| <b>CRS Highest Grade</b>                          | 80        |           |                     | <b>0.007</b> | 56      |           |                     | <b>0.040</b> |
| Grade I                                           |           | —         | —                   |              |         | —         | —                   |              |
| Grade II                                          |           | 13.5      | 2.02 to 89.6        |              |         | 1.09      | 0.77 to 1.56        |              |
| Grade III                                         |           | 28.1      | 1.57 to 504         |              |         | 2.31      | 1.21 to 4.42        |              |
| Grade IV                                          |           | 0.10      | 0.00 to 50.6        |              |         |           |                     |              |
| <b>ICANS after CAR-T</b>                          | 91        |           |                     | <b>0.009</b> | 65      |           |                     | <b>0.038</b> |
| No                                                |           | —         | —                   |              |         | —         | —                   |              |
| Yes                                               |           | 13.0      | 1.90 to 88.8        |              |         | 1.57      | 1.03 to 2.40        |              |
| <b>High-Risk Cytogenetics*</b>                    | 91        |           |                     | 0.50         | 65      |           |                     | 0.39         |
| No High-Risk CG                                   |           | —         | —                   |              |         | —         | —                   |              |
| High-Risk CG                                      |           | 1.63      | 0.40 to 6.67        |              |         | 1.13      | 0.85 to 1.51        |              |
| <b>Use of Tocilizumab after CAR-T</b>             | 29        |           |                     | <b>0.027</b> | 13      |           |                     | 0.85         |
| No                                                |           | —         | —                   |              |         | —         | —                   |              |
| Yes                                               |           | 16.9      | 1.39 to 206         |              |         | 1.06      | 0.58 to 1.93        |              |
| <b>Number of Previous Lines</b>                   | 91        | 0.82      | 0.66 to 1.02        | 0.079        | 65      | 0.99      | 0.95 to 1.04        | 0.80         |
| <b>Non-Paraskeletal Extramedullary Disease</b>    | 91        |           |                     | 0.63         | 65      |           |                     | 0.073        |
| No Non-Paraskeletal EMD                           |           | —         | —                   |              |         | —         | —                   |              |
| Non-Paraskeletal EMD                              |           | 0.70      | 0.16 to 3.09        |              |         | 0.73      | 0.52 to 1.03        |              |
| <b>Received Bispecific Agent prior to CAR-T</b>   | 91        | 0.71      | 0.10 to 4.89        | 0.73         | 65      | 0.89      | 0.47 to 1.70        | 0.72         |
| <b>ISS_Stage</b>                                  | 76        |           |                     | 0.22         | 49      |           |                     | 0.39         |
| I                                                 |           | —         | —                   |              |         | —         | —                   |              |
| II                                                |           | 0.24      | 0.04 to 1.47        |              |         | 1.12      | 0.77 to 1.63        |              |
| III                                               |           | 1.15      | 0.17 to 7.73        |              |         | 0.81      | 0.52 to 1.26        |              |
| <b>Setting of CAR-T Administration</b>            | 85        |           |                     | 0.70         | 64      |           |                     | 0.83         |
| Commercial                                        |           | —         | —                   |              |         | —         | —                   |              |
| Other clinical trial (Non-OOS)                    |           | 0.69      | 0.14 to 3.41        |              |         | 0.91      | 0.66 to 1.26        |              |
| Out-of-spec protocol/study                        |           | 0.43      | 0.06 to 3.22        |              |         | 0.83      | 0.26 to 2.60        |              |
| <b>Out-of-specification CAR-T</b>                 | 85        |           |                     | 0.48         | 64      |           |                     | 0.84         |
| Non Out-of-spec                                   |           | —         | —                   |              |         | —         | —                   |              |
| Out-of-spec protocol/study                        |           | 0.51      | 0.08 to 3.32        |              |         | 0.89      | 0.29 to 2.71        |              |
| <b>Dose of CAR-T (based on FDA approved dose)</b> | 59        |           |                     | 0.74         | 51      |           |                     | 0.081        |
| Lower than SOC Dose                               |           | —         | —                   |              |         | —         | —                   |              |
| Standard of Care Dose                             |           | 2.15      | 0.02 to 190         |              |         | 1.66      | 0.94 to 2.95        |              |

High-Risk Cytogenetics: del 17p, t(4;14), t(14;16), gain 1q. Cytokine Release Syndrome (CRS), Immune effector cell-associated neurotoxicity syndrome (ICANS)  
<sup>1</sup> CI = Confidence Interval

**Supplemental Table S3:** Univariable regression for max absolute lymphocyte count by BCMA CAR-T product.

| Characteristic                                          | N   | HR <sup>1</sup> | 95% CI <sup>1</sup> | p-value          | q-value <sup>2</sup> |
|---------------------------------------------------------|-----|-----------------|---------------------|------------------|----------------------|
| <b>ALCmax</b>                                           | 155 | 0.83            | 0.72 to 0.95        | <b>0.002</b>     | <b>0.011</b>         |
| <b>Age at CAR-T infusion</b>                            | 155 | 0.97            | 0.95 to 1.00        | <b>0.037</b>     | <b>0.053</b>         |
| <b>ISS Staging</b>                                      | 124 |                 |                     | 0.55             | 0.57                 |
| I                                                       |     | —               | —                   |                  |                      |
| II                                                      |     | 1.23            | 0.68 to 2.21        |                  |                      |
| III                                                     |     | 0.83            | 0.43 to 1.63        |                  |                      |
| <b>ALCmax levels</b>                                    | 155 |                 |                     | <b>&lt;0.001</b> | <b>&lt;0.001</b>     |
| high                                                    |     | —               | —                   |                  |                      |
| Int                                                     |     | 2.93            | 1.72 to 4.99        |                  |                      |
| low                                                     |     | 6.00            | 3.27 to 11.0        |                  |                      |
| <b>Bone marrow plasmacytosis</b>                        | 123 | 1.01            | 1.00 to 1.02        | <b>0.044</b>     | <b>0.060</b>         |
| <b>M-protein</b>                                        | 149 | 1.25            | 1.01 to 1.55        | <b>0.049</b>     | <b>0.062</b>         |
| <b>FLC ratio</b>                                        | 153 | 1.00            | 1.00 to 1.00        | <b>0.036</b>     | <b>0.053</b>         |
| <b>Ferritin pre-lymphodepletion</b>                     | 155 | 1.00            | 1.00 to 1.00        | <b>0.006</b>     | <b>0.018</b>         |
| <b>D-dimer pre-lymphodepletion</b>                      | 98  | 1.55            | 1.09 to 2.19        | <b>0.021</b>     | <b>0.041</b>         |
| <b>C reactive protein pre-lymphodepletion</b>           | 150 | 1.35            | 1.10 to 1.66        | <b>0.010</b>     | <b>0.028</b>         |
| <b>ALC~max~ &gt; 1x10<sup>3</sup>/uL</b>                | 155 |                 |                     | <b>&lt;0.001</b> | <b>&lt;0.001</b>     |
| ALC <= 1 x 10 <sup>3</sup> cel/uL                       |     | —               | —                   |                  |                      |
| ALC > 1 x 10 <sup>3</sup> cel/uL                        |     | 0.27            | 0.17 to 0.44        |                  |                      |
| <b>Previous transplant</b>                              | 155 | 1.60            | 0.80 to 3.22        | 0.16             | 0.19                 |
| <b>Out of specification product</b>                     | 148 |                 |                     | 0.70             | 0.70                 |
| No                                                      |     | —               | —                   |                  |                      |
| Yes                                                     |     | 1.21            | 0.48 to 3.06        |                  |                      |
| <b>ALC~max~ &lt;= 0.5x10<sup>3</sup>/uL</b>             | 155 |                 |                     | <b>&lt;0.001</b> | <b>&lt;0.001</b>     |
| ALC > 0.5 x 10 <sup>3</sup> cel/uL                      |     | —               | —                   |                  |                      |
| ALC <= 0.5 x 10 <sup>3</sup> cel/uL                     |     | 3.84            | 2.25 to 6.53        |                  |                      |
| <b>Last line Alkylating Chemotherapy</b>                | 153 | 1.68            | 1.05 to 2.70        | <b>0.035</b>     | <b>0.053</b>         |
| <b>bendamustine</b>                                     | 153 | 3.23            | 1.47 to 7.11        | <b>0.012</b>     | <b>0.029</b>         |
| <b>cyclophosphamide</b>                                 | 153 | 1.83            | 1.12 to 2.98        | <b>0.020</b>     | <b>0.041</b>         |
| <b>High-Risk Cytogenetics</b>                           | 155 |                 |                     | <b>0.024</b>     | <b>0.042</b>         |
| No High-Risk CG                                         |     | —               | —                   |                  |                      |
| High-Risk CG                                            |     | 1.75            | 1.06 to 2.91        |                  |                      |
| <b>CAR-T product</b>                                    | 155 |                 |                     | <b>0.003</b>     | <b>0.012</b>         |
| Abecma                                                  |     | —               | —                   |                  |                      |
| Carvykti                                                |     | 0.51            | 0.32 to 0.80        |                  |                      |
| <b>Cytokine Release Syndrome (CRS) during admission</b> | 155 |                 |                     | 0.50             | 0.55                 |
| No                                                      |     | —               | —                   |                  |                      |
| Yes                                                     |     | 0.80            | 0.42 to 1.52        |                  |                      |
| <b>ICANS during admission</b>                           | 155 |                 |                     | 0.34             | 0.39                 |
| No                                                      |     | —               | —                   |                  |                      |
| Yes                                                     |     | 1.40            | 0.72 to 2.73        |                  |                      |
| <b>Non-Paraskeletal EMD</b>                             | 155 |                 |                     | <b>&lt;0.001</b> | <b>0.002</b>         |
| No Non-Paraskeletal EMD                                 |     | —               | —                   |                  |                      |
| Non-Paraskeletal EMD                                    |     | 2.49            | 1.55 to 3.99        |                  |                      |
| <b>Number of previous lines</b>                         | 155 | 1.08            | 1.02 to 1.15        | <b>0.012</b>     | <b>0.029</b>         |

<sup>1</sup> HR = Hazard Ratio, CI = Confidence Interval

<sup>2</sup> False discovery rate correction for multiple testing

**Supplemental Table S4A:** Univariable Analysis for Progression Free Survival in patients with >1 month of Follow-up.

**Supplemental Table S5B: Univariable Analysis for Progression Free Survival in patients with >1 month of Follow-up and according to the CAR-T product received.**

| Characteristic                              | Univariable Cox PFS |                 |                     |                  |                      |              |                 |                     |              |                      |
|---------------------------------------------|---------------------|-----------------|---------------------|------------------|----------------------|--------------|-----------------|---------------------|--------------|----------------------|
|                                             | PFS - Carvikty      |                 |                     |                  |                      | PFS - Abecma |                 |                     |              |                      |
|                                             | N                   | HR <sup>1</sup> | 95% CI <sup>1</sup> | p-value          | q-value <sup>2</sup> | N            | HR <sup>1</sup> | 95% CI <sup>1</sup> | p-value      | q-value <sup>2</sup> |
| <b>ALCmax</b>                               | 91                  | 0.94            | 0.82 to 1.08        | 0.37             | 0.43                 | 65           | 0.43            | 0.21 to 0.86        | <b>0.010</b> | <b>0.042</b>         |
| <b>ALCmax tiles</b>                         | 91                  |                 |                     | <b>0.010</b>     | <b>0.026</b>         | 65           |                 |                     | <b>0.006</b> | <b>0.035</b>         |
| 1                                           |                     | —               | —                   |                  |                      |              | —               | —                   |              |                      |
| 2                                           |                     | 0.31            | 0.13 to 0.71        |                  |                      |              | 0.46            | 0.22 to 0.94        |              |                      |
| 3                                           |                     | 0.37            | 0.16 to 0.84        |                  |                      |              | 0.28            | 0.13 to 0.62        |              |                      |
| <b>ALC~max~ &gt; 1x10<sup>3</sup>/uL</b>    | 91                  |                 |                     | <b>&lt;0.001</b> | <b>&lt;0.001</b>     | 65           |                 |                     | <b>0.018</b> | <b>0.057</b>         |
| ALC <= 1 x 10 <sup>3</sup> cel/uL           |                     | —               | —                   |                  |                      |              | —               | —                   |              |                      |
| ALC > 1 x 10 <sup>3</sup> cel/uL            |                     | 0.24            | 0.11 to 0.48        |                  |                      |              | 0.45            | 0.22 to 0.91        |              |                      |
| <b>ALC~max~ &lt;= 0.5x10<sup>3</sup>/uL</b> | 91                  |                 |                     | <b>0.016</b>     | <b>0.032</b>         | 65           |                 |                     | <b>0.001</b> | <b>0.024</b>         |
| ALC > 0.5 x 10 <sup>3</sup> cel/uL          |                     | —               | —                   |                  |                      |              | —               | —                   |              |                      |
| ALC <= 0.5 x 10 <sup>3</sup> cel/uL         |                     | 4.09            | 1.52 to 11.0        |                  |                      |              | 3.07            | 1.59 to 5.96        |              |                      |
| <b>High-Risk Cytogenetics</b>               | 91                  |                 |                     | 0.19             | 0.25                 | 65           |                 |                     | 0.077        | 0.18                 |
| No High-Risk CG                             |                     | —               | —                   |                  |                      |              | —               | —                   |              |                      |
| High-Risk CG                                |                     | 1.62            | 0.77 to 3.40        |                  |                      |              | 1.81            | 0.91 to 3.59        |              |                      |
| <b>CRS during admission</b>                 | 91                  |                 |                     | 0.84             | 0.90                 | 65           |                 |                     | 0.79         | 0.96                 |
| No                                          |                     | —               | —                   |                  |                      |              | —               | —                   |              |                      |
| Yes                                         |                     | 0.90            | 0.31 to 2.56        |                  |                      |              | 0.89            | 0.38 to 2.09        |              |                      |
| <b>ICANS during admission</b>               | 91                  |                 |                     | 0.14             | 0.20                 | 65           |                 |                     | 0.86         | 0.96                 |
| No                                          |                     | —               | —                   |                  |                      |              | —               | —                   |              |                      |
| Yes                                         |                     | 2.06            | 0.85 to 5.01        |                  |                      |              | 1.09            | 0.43 to 2.77        |              |                      |
| <b>Non-Paraskeletal EMD</b>                 | 91                  |                 |                     | <b>&lt;0.001</b> | <b>&lt;0.001</b>     | 65           |                 |                     | 0.21         | 0.34                 |
| No Non-Paraskeletal EMD                     |                     | —               | —                   |                  |                      |              | —               | —                   |              |                      |
| Non-Paraskeletal EMD                        |                     | 3.91            | 1.97 to 7.77        |                  |                      |              | 1.61            | 0.79 to 3.27        |              |                      |
| <b>Age at CAR-T infusion</b>                | 91                  | 1.00            | 0.96 to 1.04        | 0.98             | 0.98                 | 65           | 0.96            | 0.93 to 0.99        | <b>0.007</b> | <b>0.035</b>         |
| <b>Number of previous lines</b>             | 91                  | 1.09            | 1.00 to 1.19        | 0.058            | <b>0.093</b>         | 65           | 1.08            | 1.00 to 1.18        | 0.067        | 0.18                 |
| <b>Bone marrow plasmacytosis</b>            | 62                  | 1.02            | 1.01 to 1.03        | <b>0.007</b>     | <b>0.021</b>         | 61           | 1.00            | 0.99 to 1.01        | 0.96         | 0.96                 |
| <b>M-protein</b>                            | 85                  | 1.24            | 0.90 to 1.70        | 0.20             | 0.25                 | 65           | 1.25            | 0.92 to 1.69        | 0.17         | 0.33                 |
| <b>FLC ratio</b>                            | 89                  | 1.00            | 1.00 to 1.00        | <b>&lt;0.001</b> | <b>0.001</b>         | 65           | 1.00            | 1.00 to 1.00        | 0.62         | 0.83                 |
| <b>Ferritin at baseline (Log)</b>           | 91                  | 2.08            | 1.54 to 2.82        | <b>&lt;0.001</b> | <b>&lt;0.001</b>     | 65           | 1.10            | 0.88 to 1.38        | 0.41         | 0.60                 |
| <b>C reactive protein (CRP)</b>             | 90                  | 1.48            | 1.05 to 2.09        | <b>0.047</b>     | <b>0.083</b>         | 61           | 1.21            | 0.93 to 1.57        | 0.18         | 0.33                 |
| <b>Last line Alkylating Chemotherapy</b>    | 89                  | 2.63            | 1.27 to 5.43        | <b>0.011</b>     | <b>0.026</b>         | 65           | 0.96            | 0.52 to 1.80        | 0.91         | 0.96                 |

<sup>1</sup> HR = Hazard Ratio, CI = Confidence Interval

<sup>2</sup> False discovery rate correction for multiple testing

**Multivariable Cox DoR - All Patients**

| <b>Characteristic</b>                          | <b>N</b> | <b>HR<sup>1</sup></b> | <b>95% CI<sup>1</sup></b> | <b>p-value</b> |
|------------------------------------------------|----------|-----------------------|---------------------------|----------------|
| <b>ALCmax &gt;1 10<sup>3</sup>/uL</b>          | 137      |                       |                           |                |
| ALC ≤ 1 x 10 <sup>3</sup> cel/uL               |          | —                     | —                         |                |
| ALC > 1 x 10 <sup>3</sup> cel/uL               |          | 0.43                  | 0.22 to 0.84              | <b>0.013</b>   |
| <b>Non-Paraskeletal Extramedullary Disease</b> | 137      |                       |                           |                |
| No Non-Paraskeletal EMD                        |          | —                     | —                         |                |
| Non-Paraskeletal EMD                           |          | 2.03                  | 1.10 to 3.74              | <b>0.024</b>   |
| <b>CAR-T product</b>                           | 137      |                       |                           |                |
| Cilta-cel                                      |          | —                     | —                         |                |
| Ide-cel                                        |          | 2.02                  | 1.03 to 3.99              | <b>0.042</b>   |
| <b>Number of Previous Lines</b>                | 137      | 1.04                  | 0.97 to 1.13              | 0.28           |
| <b>High-risk cytogenetics*</b>                 | 137      |                       |                           |                |
| No High-Risk CG                                |          | —                     | —                         |                |
| High-Risk CG                                   |          | 1.82                  | 0.98 to 3.39              | 0.058          |

\*High-Risk Cytogenetics: del 17p, t(4;14), t(14;16), or gain 1q  
<sup>1</sup> HR = Hazard Ratio, CI = Confidence Interval

**Supplemental Table S6:** Multivariable Cox Proportional Hazard Model for Duration of Response (DoR) in BCMA CAR-T cohort.

**Multivariable Regression of Achieving VGPR/CR by max ALC**

| <b>Characteristic</b>                          | <b>OR<sup>1</sup></b> | <b>95% CI<sup>1</sup></b> | <b>p-value</b> |
|------------------------------------------------|-----------------------|---------------------------|----------------|
| <b>ALCmax</b>                                  | 1.37                  | 1.07 to 1.94              | 0.037          |
| <b>Non-Paraskeletal Extramedullary Disease</b> |                       |                           |                |
| No Non-Paraskeletal EMD                        | —                     | —                         |                |
| Non-Paraskeletal EMD                           | 0.34                  | 0.14 to 0.80              | 0.013          |

<sup>1</sup> OR = Odds Ratio, CI = Confidence Interval

**Supplemental Table S7:** Multivariable binomial regression for achieving VGPR/CR by ALC<sub>max</sub> and presence of non-paraskeletal extramedullary disease.

| Characteristic                   | Cilta-cel |                 |                     |         | Ide-cel |                 |                     |         |
|----------------------------------|-----------|-----------------|---------------------|---------|---------|-----------------|---------------------|---------|
|                                  | N         | OR <sup>1</sup> | 95% CI <sup>1</sup> | p-value | N       | OR <sup>1</sup> | 95% CI <sup>1</sup> | p-value |
| <b>ALC max Group</b>             | 62        |                 |                     |         | 56      |                 |                     |         |
| ALC ≤ 1 x 10 <sup>3</sup> cel/uL |           | —               | —                   |         |         | —               | —                   |         |
| ALC > 1 x 10 <sup>3</sup> cel/uL |           | 0.26            | 0.08 to 0.84        | 0.028   |         | 0.26            | 0.07 to 0.95        | 0.042   |

<sup>1</sup> OR = Odds Ratio, CI = Confidence Interval

**Supplemental Table S8:** Univariable logistic regression for no relapse at last follow up in patients with >6 months of follow up by CAR-T product.

| Characteristic                     | OR <sup>1</sup> | 95% CI <sup>1</sup> | p-value |
|------------------------------------|-----------------|---------------------|---------|
| <b>ALCmax Group</b>                |                 |                     |         |
| ALC ≤ 1 x 10 <sup>3</sup> cel/uL   | —               | —                   |         |
| ALC > 1 x 10 <sup>3</sup> cel/uL   | 0.19            | 0.08 to 0.43        | <0.001  |
| <b>Non-Paraskeletal EMD Status</b> |                 |                     |         |
| No Non-Paraskeletal EMD            | —               | —                   |         |
| Non-Paraskeletal EMD               | 2.94            | 1.06 to 9.08        | 0.046   |

<sup>1</sup> OR = Odds Ratio, CI = Confidence Interval

**Supplemental Table S8:** Multivariable logistic regression for no relapse at last follow up in patients with >6 months of follow up by CAR-T product.



| Characteristic                                                          | ALC $\leq 1 \times 10^3$ cel/uL, N = 70 <sup>1</sup> | ALC $> 1 \times 10^3$ cel/uL, N = 86 <sup>1</sup> | p-value <sup>2</sup> |
|-------------------------------------------------------------------------|------------------------------------------------------|---------------------------------------------------|----------------------|
| <b>Age at CAR-T Infusion</b>                                            | 61 (53 – 69)                                         | 63 (57 – 69)                                      | 0.25                 |
| <b>Bone Marrow Plasma cells (%) pre-CAR-T</b>                           | 10 (2 – 40)                                          | 12 (2 – 45)                                       | 0.86                 |
| <b>M-protein pre-CAR-T</b>                                              | 0.92 (0.00 – 1.78)                                   | 0.30 (0.00 – 1.31)                                | 0.20                 |
| <b>Involved/Uninvolved Free Light at CAR-T</b>                          | 63 (5 – 308)                                         | 47 (5 – 266)                                      | 0.87                 |
| <b>Lymphodepleting Conditioning</b>                                     |                                                      |                                                   | 0.75                 |
| Bendamustine                                                            | 5 (7.1)                                              | 5 (5.8)                                           |                      |
| Flu/Cy                                                                  | 65 (93)                                              | 81 (94)                                           |                      |
| <b>Extramedullary Disease Previous to CAR-T</b>                         |                                                      |                                                   | 0.063                |
| No Non-Paraskeletal EMD                                                 | 48 (69)                                              | 70 (81)                                           |                      |
| Non-Paraskeletal EMD                                                    | 22 (31)                                              | 16 (19)                                           |                      |
| <b>ISS Stage at Diagnosis</b>                                           |                                                      |                                                   | 0.32                 |
| I                                                                       | 19 (37)                                              | 36 (49)                                           |                      |
| II                                                                      | 20 (39)                                              | 20 (27)                                           |                      |
| III                                                                     | 12 (24)                                              | 18 (24)                                           |                      |
| <b>Previous Bispecific Use</b>                                          | 8 (11)                                               | 8 (9.3)                                           | 0.66                 |
| <b>High-risk Cytogenetics</b>                                           |                                                      |                                                   | 0.79                 |
| No High-Risk CG                                                         | 25 (36)                                              | 29 (34)                                           |                      |
| High-Risk CG                                                            | 45 (64)                                              | 57 (66)                                           |                      |
| <b>Cytotoxic Chemotherapy as most recent line before leukoapheresis</b> | 32 (46)                                              | 23 (27)                                           | <b>0.018</b>         |
| <b>Last Line Contained Cyclophosphamide</b>                             | 25 (36)                                              | 18 (21)                                           | <b>0.049</b>         |
| <b>Last Line Contained Bendamustine</b>                                 | 7 (10)                                               | 1 (1.2)                                           | <b>0.024</b>         |
| <b>Previous Autologous Stem Cell Transplant</b>                         | 61 (87)                                              | 72 (84)                                           | 0.55                 |
| <b>ALC pre-lymphodepletion</b>                                          | 0.70 (0.50 – 1.00)                                   | 1.00 (0.50 – 1.30)                                | <b>0.047</b>         |
| <b>ALC at day 0</b>                                                     | 0.04 (0.00 – 0.10)                                   | 0.04 (0.00 – 0.10)                                | 0.86                 |
| <b>Ferritin pre-lymphodepletion</b>                                     | 170 (76 – 355)                                       | 143 (55 – 372)                                    | 0.53                 |
| <b>C-Reactive Protein pre-lymphodepletion</b>                           | 0.40 (0.20 – 0.87)                                   | 0.39 (0.18 – 0.78)                                | 0.33                 |
| <b>D-Dimer Pre-lymphodepletion</b>                                      | 0.71 (0.30 – 1.45)                                   | 0.55 (0.37 – 1.01)                                | 0.37                 |
| <b>Peak Ferritin day 0-30</b>                                           | 536 (250 – 1,843)                                    | 1,040 (319 – 3,019)                               | 0.12                 |

High-Risk Cytogenetics: del 17p, t(4;14), t(14;16), gain 1q. Absolute Lymphocyte Count (ALC)

<sup>1</sup> Median (IQR); n (%)

<sup>2</sup> Wilcoxon rank sum test; Fisher's exact test; Pearson's Chi-squared test

**Supplemental Table S9:** Baseline characteristics across the three ALC<sub>max</sub> subgroups ( $\leq 1$  and  $\leq 1.0$ , and  $>1.0 \times 10^3/\mu\text{L}$ ).

| Characteristic                               | Infection Event, N = 33 <sup>1</sup> | No Infection Event, N = 123 <sup>1</sup> | p-value <sup>2</sup> |
|----------------------------------------------|--------------------------------------|------------------------------------------|----------------------|
| <b>ALCmax day 0-15</b>                       | 1.40 (0.79 – 3.40)                   | 1.25 (0.60 – 2.53)                       | 0.20                 |
| <b>ANCmax day 0-15</b>                       | 4.0 (2.4 – 5.5)                      | 4.7 (2.7 – 7.1)                          | 0.29                 |
| <b>ALCmax &gt; 1 10<sup>3</sup>/uL</b>       |                                      |                                          | 0.75                 |
| ALC <= 1 x 10 <sup>3</sup> cel/uL            | 14 (42)                              | 56 (46)                                  |                      |
| ALC > 1 x 10 <sup>3</sup> cel/uL             | 19 (58)                              | 67 (54)                                  |                      |
| <b>Number of Previous Lines of Treatment</b> | 5.0 (4.0 – 7.0)                      | 5.0 (4.0 – 8.0)                          | 0.70                 |
| <b>Age at infusion CAR-T</b>                 | 66 (50 – 71)                         | 62 (55 – 69)                             | 0.68                 |
| <b>Year of CAR-T Infusion</b>                |                                      |                                          | 0.66                 |
| 2017-2018                                    | 3 (9.1)                              | 18 (15)                                  |                      |
| 2019-2021                                    | 12 (36)                              | 48 (39)                                  |                      |
| 2022-2023                                    | 18 (55)                              | 57 (46)                                  |                      |

Absolute Lymphocyte Count (ALC), Absolute Neutrophil Coun (ANC)

<sup>1</sup> Median (IQR); n (%)

<sup>2</sup> Wilcoxon rank sum test; Pearson's Chi-squared test; Fisher's exact test

**Supplemental Table S10:** ALC and other baseline characteristics of patients who developed infection during the initial 30 day period compared to those without infection.

| Characteristic                      | N = 33 <sup>1</sup> |
|-------------------------------------|---------------------|
| <b>fungal</b>                       |                     |
| No                                  | 33 (100)            |
| <b>bacterial</b>                    |                     |
| No                                  | 26 (79)             |
| Yes                                 | 7 (21)              |
| <b>viral</b>                        |                     |
| No                                  | 21 (64)             |
| Yes                                 | 12 (36)             |
| <b>Day after CAR-T of Infection</b> | 4 (1 – 17)          |
| <b>Receiving IVIG</b>               |                     |
| No                                  | 19 (58)             |
| Yes                                 | 14 (42)             |
| <b>ANC at Infection Event</b>       | 1.70 (0.90 – 2.50)  |
| <b>ALC at Infection Event</b>       | 0.16 (0.03 – 0.40)  |

Absolute Neutrophil Count (ANC), Absolute Lymphocyte Count (ALC)

<sup>1</sup> n (%); Median (IQR)

**Supplemental Table S11:** Characteristics of non-neutropenic infectious event during the first 30 days in patients receiving BCMA CAR-T.

## Supplemental Figures

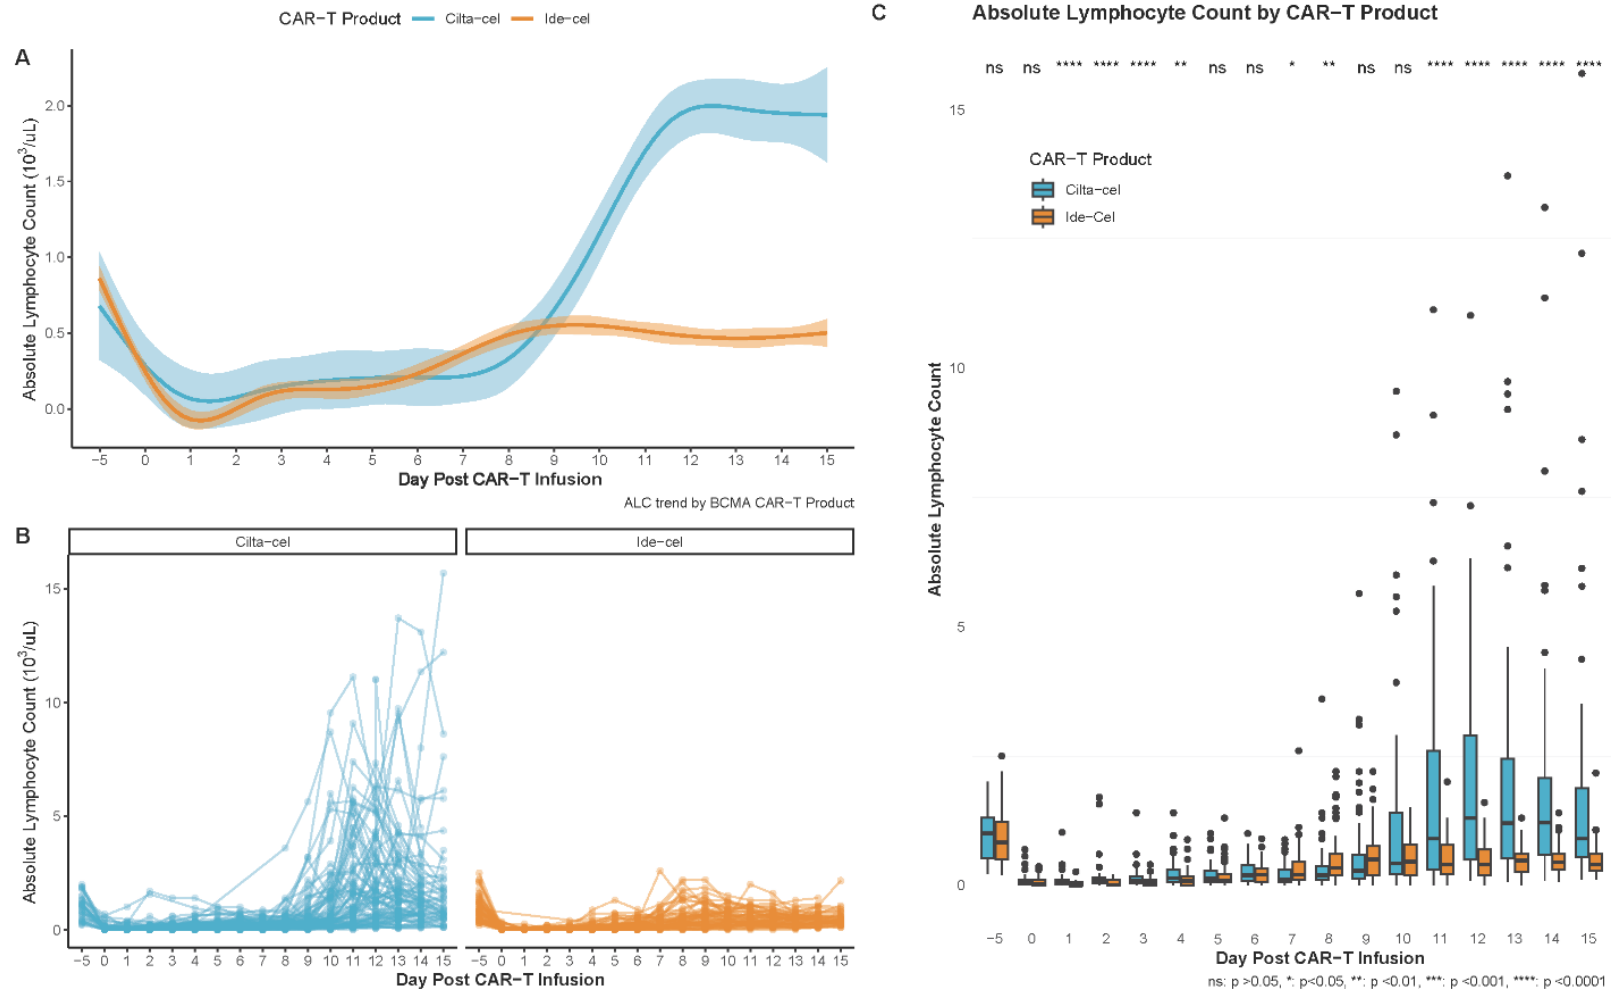

**Supplemental Figure S1:** Median absolute lymphocyte count during day -5 through +15 by BCMA CAR-T product, shaded areas represent 95% CI (A). Individual absolute lymphocyte count for each BCMA CAR-T product from day -5 through +15 (B). Pairwise comparison between BCMA CAR-T products comparing median ALC (C).

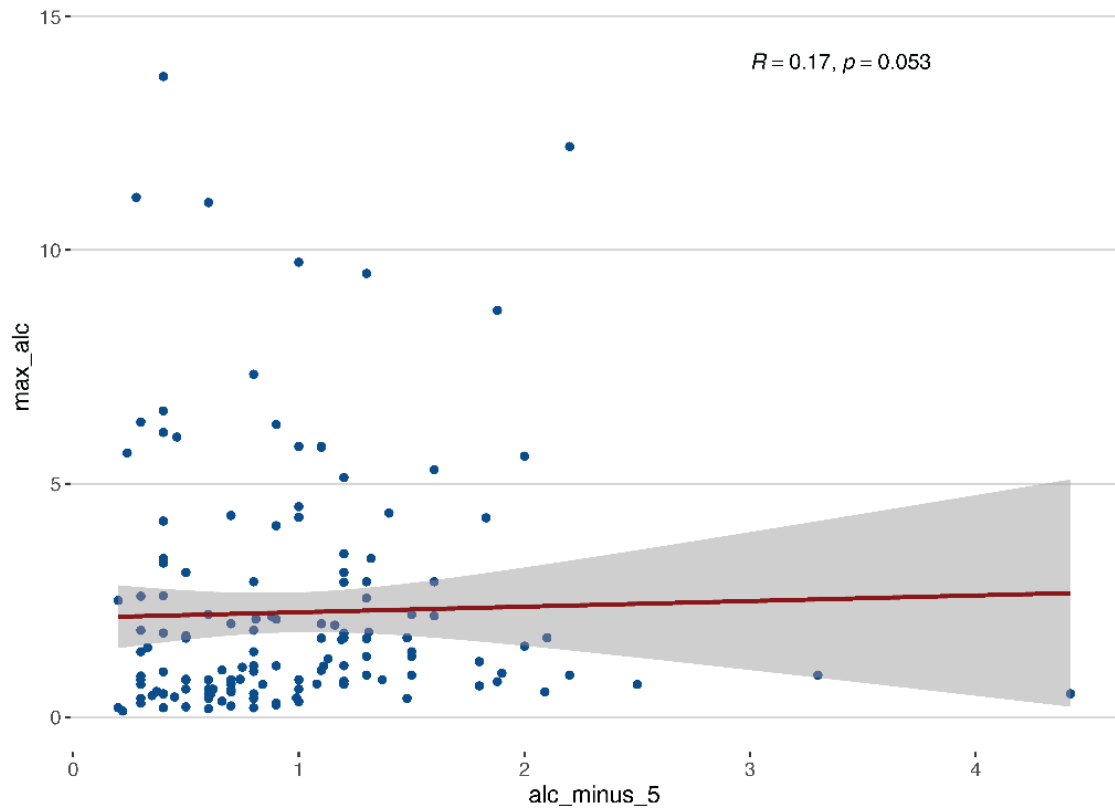

**Supplemental Figure S2:** Correlation of pre-conditioning (ALC<sub>minus\_5</sub>) and ALC<sub>max</sub> for all patients treated with BCMA CAR-T.

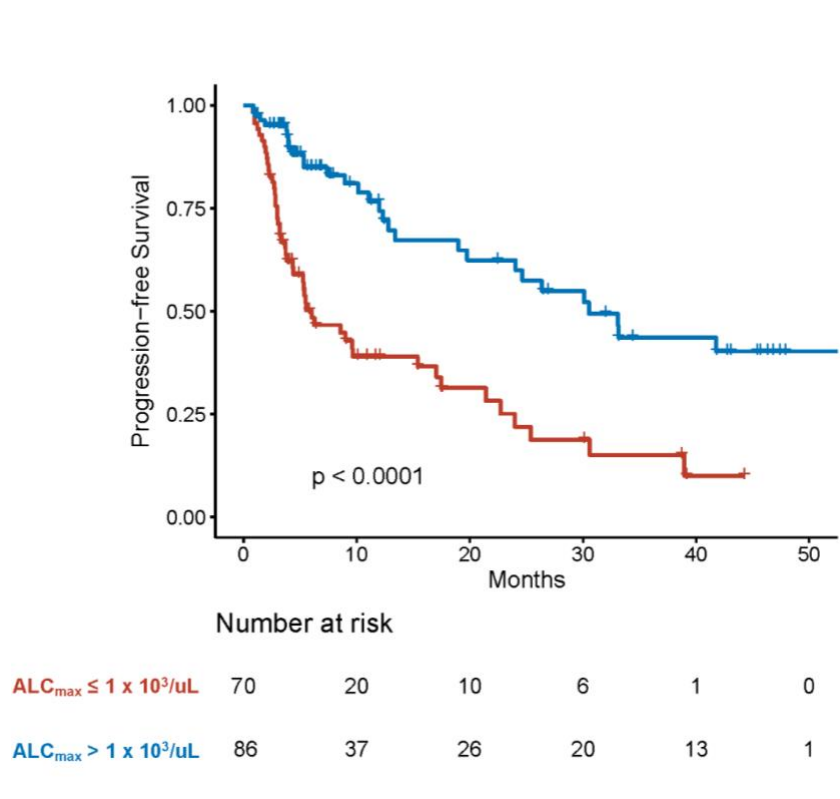

**Supplemental Figure S3:** Duration of Response by max absolute lymphocyte count subgroup in the BCMA CAR-T Cohort.

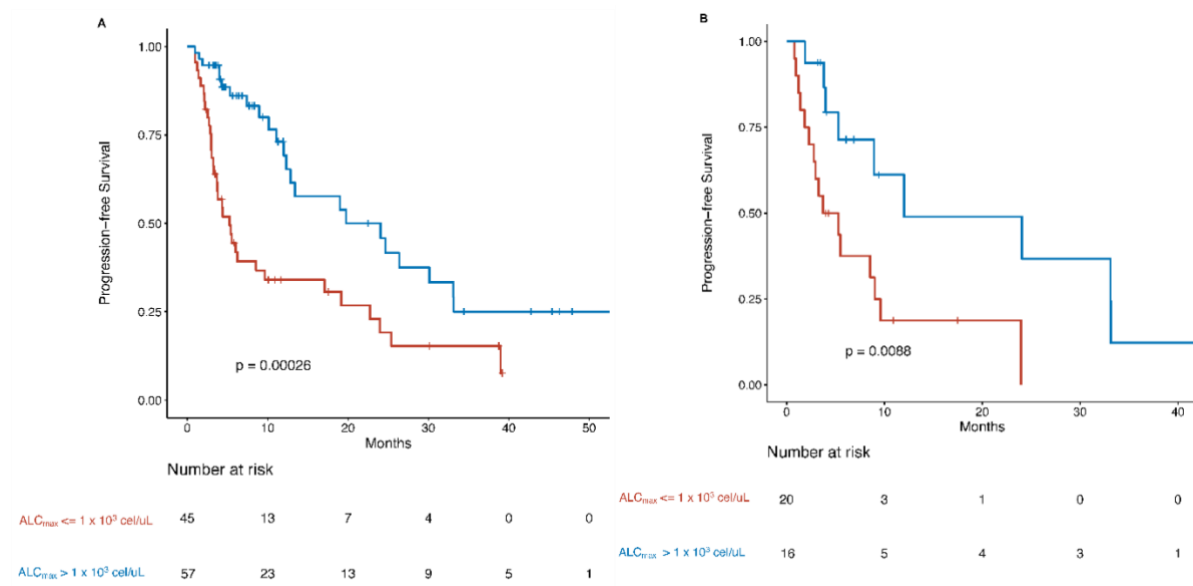

**Supplemental Figure S4:** Progression free survival in patients with High-Risk Cytogenetics (A) and non-paraskeletal extramedullary disease (B) by  $ALC_{max}$  treated with BCMA CAR-T. High-risk cytogenetics defined as presence of any of Gain 1q, t(4;14), t(14;16) or deletion 17p.

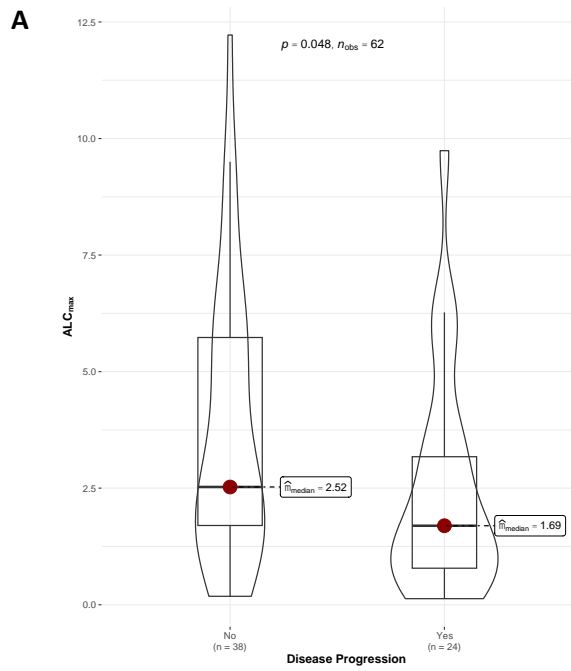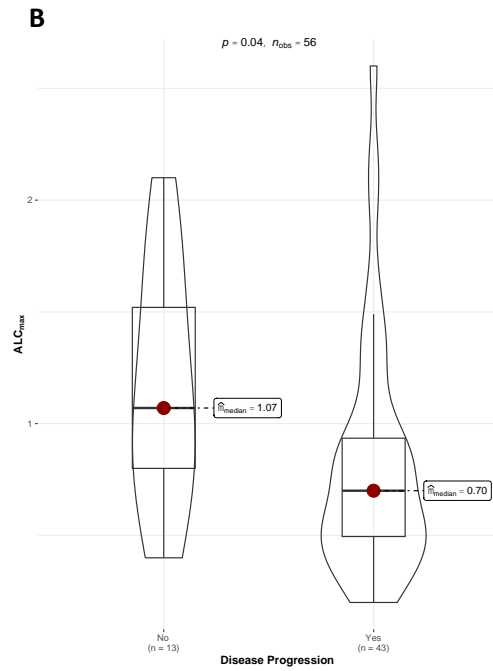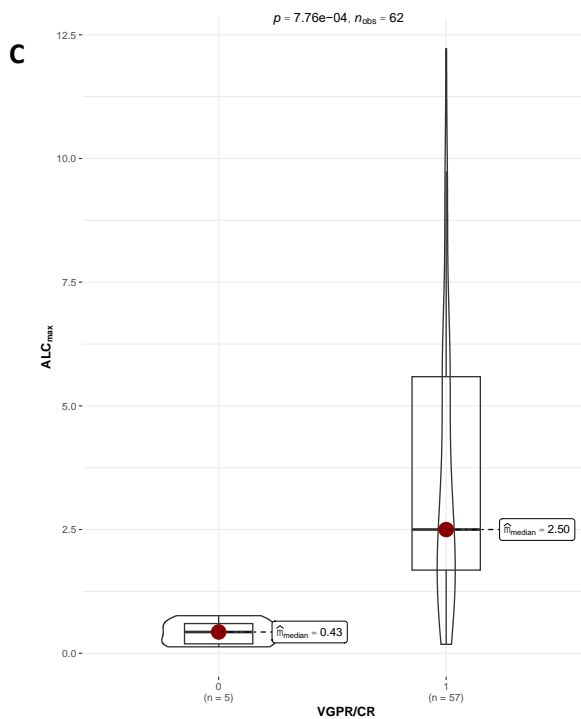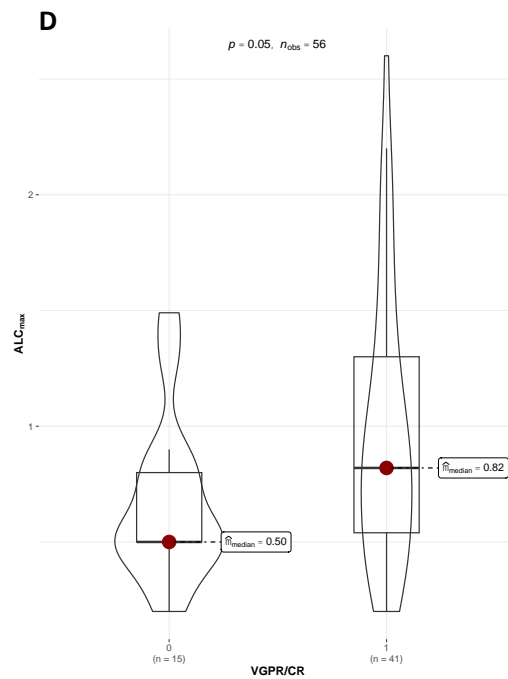

**Supplemental Figure S5: (A & B)** ALC<sub>max</sub> and Progression status for patients with more than 6 months follow up in cilta-cel and Ide-cel, respectively. **(C & D)** ALC<sub>max</sub> between patients achieving VGPR or CR as best response for patients with more than 6 months follow up in cilta-cel and Ide-cel, respectively.

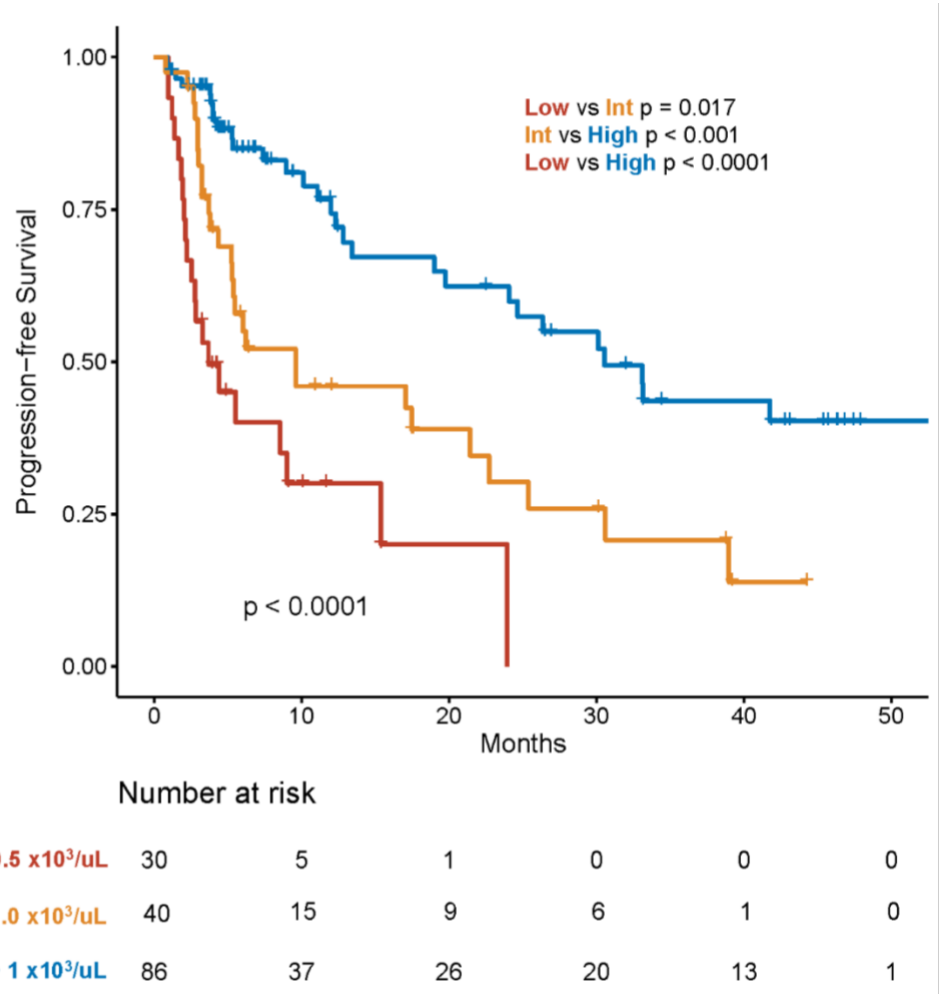

**Supplemental Figure S5:** Progression Free Survival by ALC<sub>max</sub> group and pairwise-comparison between groups.

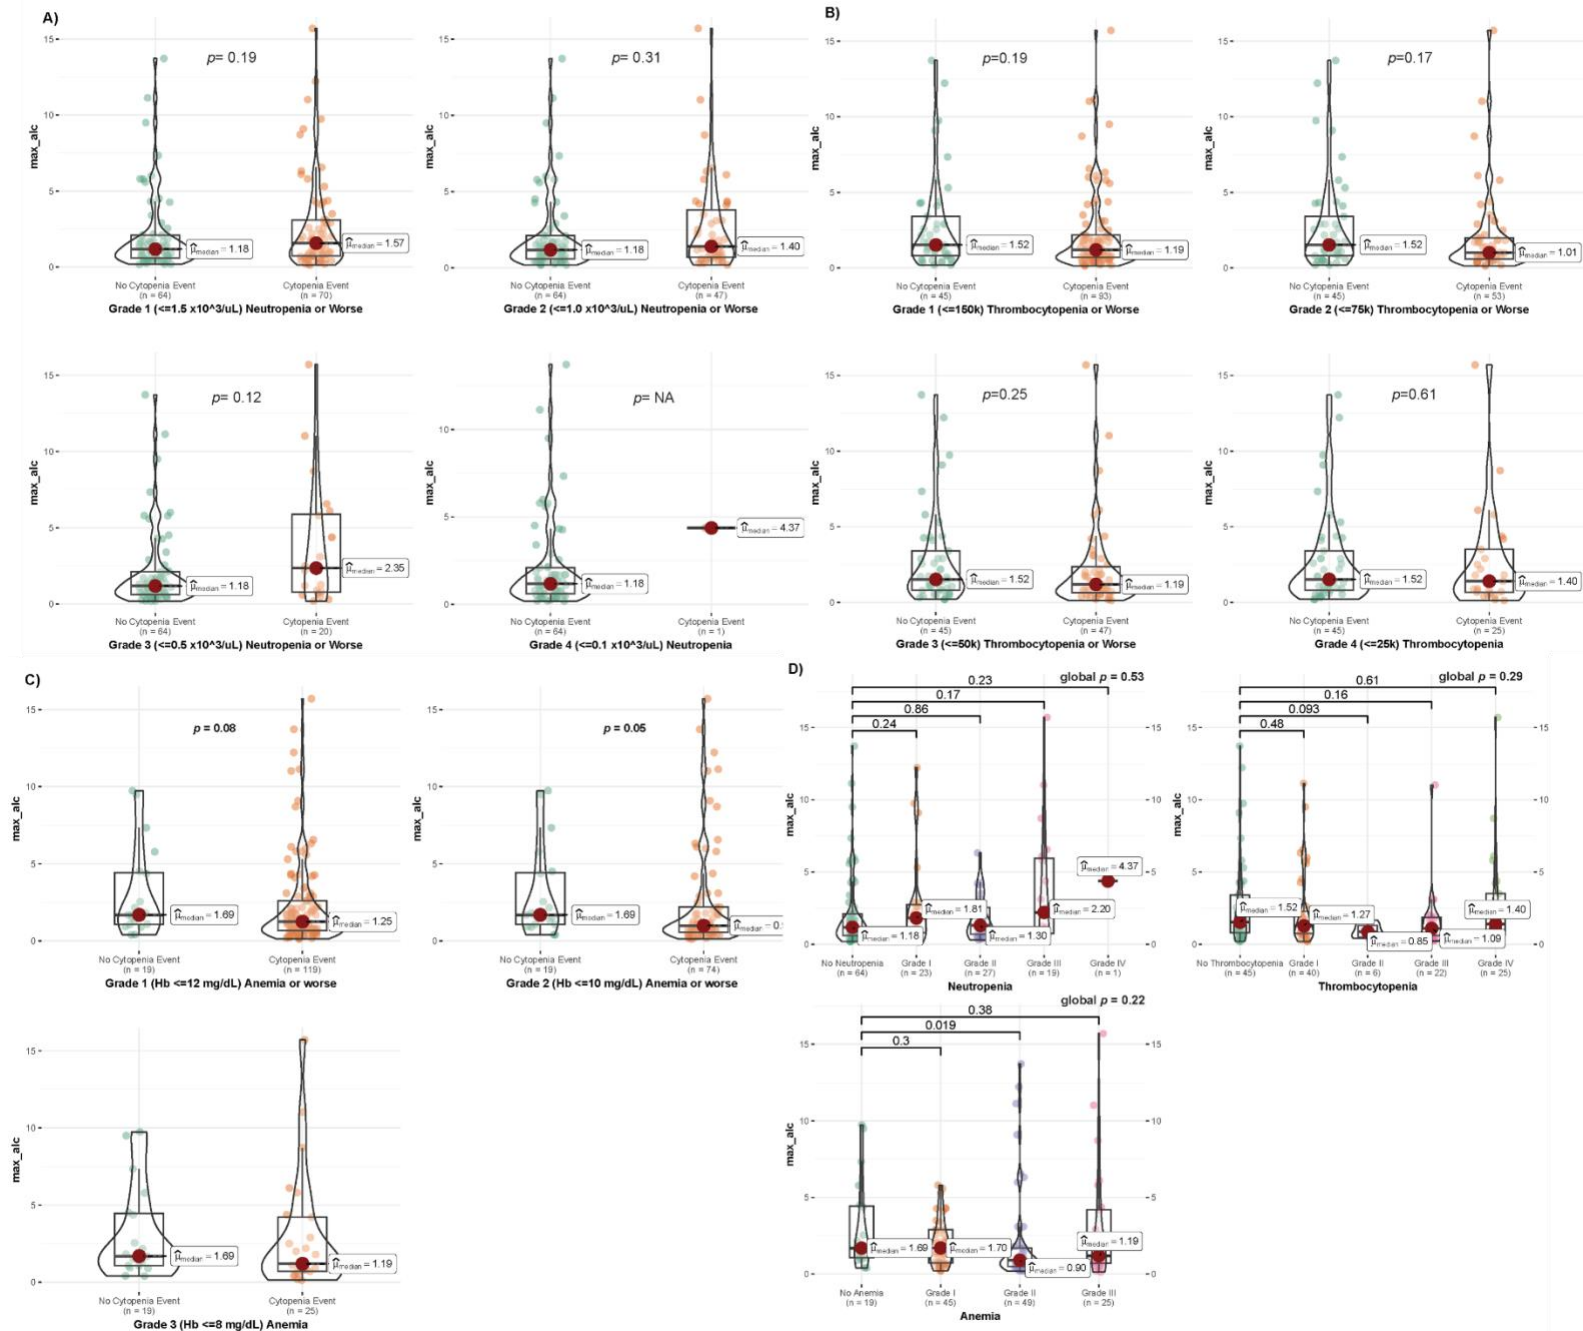

**Supplemental Figure S7:** median  $\text{ALC}_{\text{max}}$  comparison between non-cytopenia and those with grade 1-4 or greater delayed cytopenia for neutropenia (A), thrombocytopenia (B), and anemia (C). Figure D displays pairwise comparison of the non-cytopenia group with each individual cytopenia grade. Cytopenia was considered only if two consecutive values were below the prespecified value.



**Supplemental Figure S8:** Flow Cytometry analysis of four patients at day 14 showing the percentage of BCMA positive T cells from the CD3 lymphocytes gate. **(A-C)** Three patients who had high ALCmax and in remission as of last date of follow up. **(D)** A patient who has not responded to BCMA CAR-T therapy and relapsed within 2 months of CAR-T cells infusion.

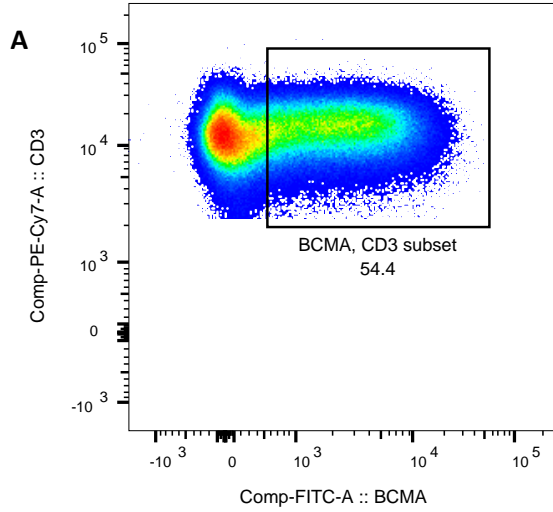

Patient # 18

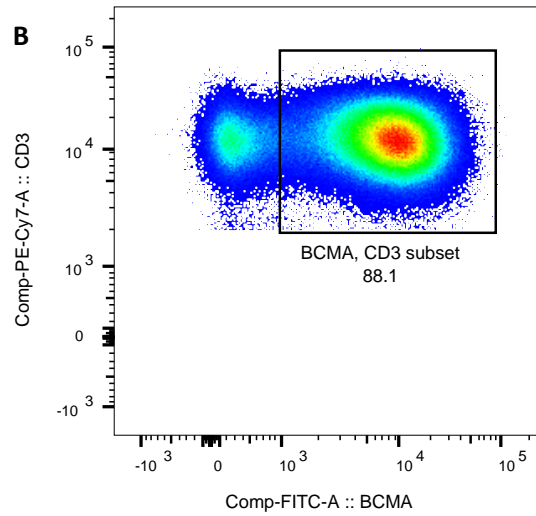

Patient # 41

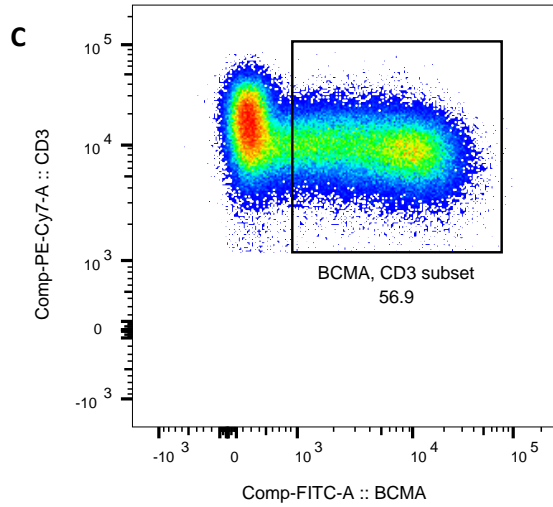

Patient # 44

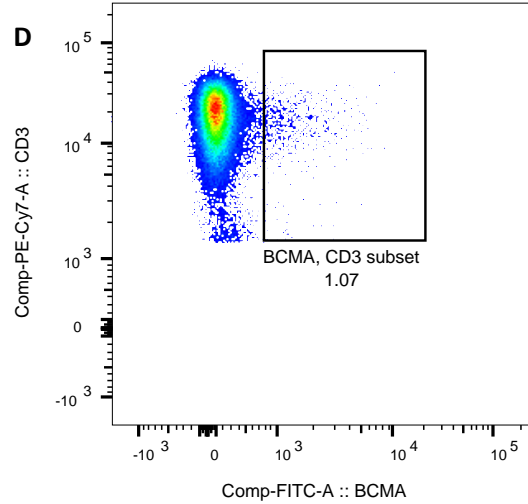

Patient # 17

**Supplemental Figure S9:** Graph plot of four patients the percentage of BCMA positive T cells from the CD3 lymphocytes gate at days 7, 14, and 21

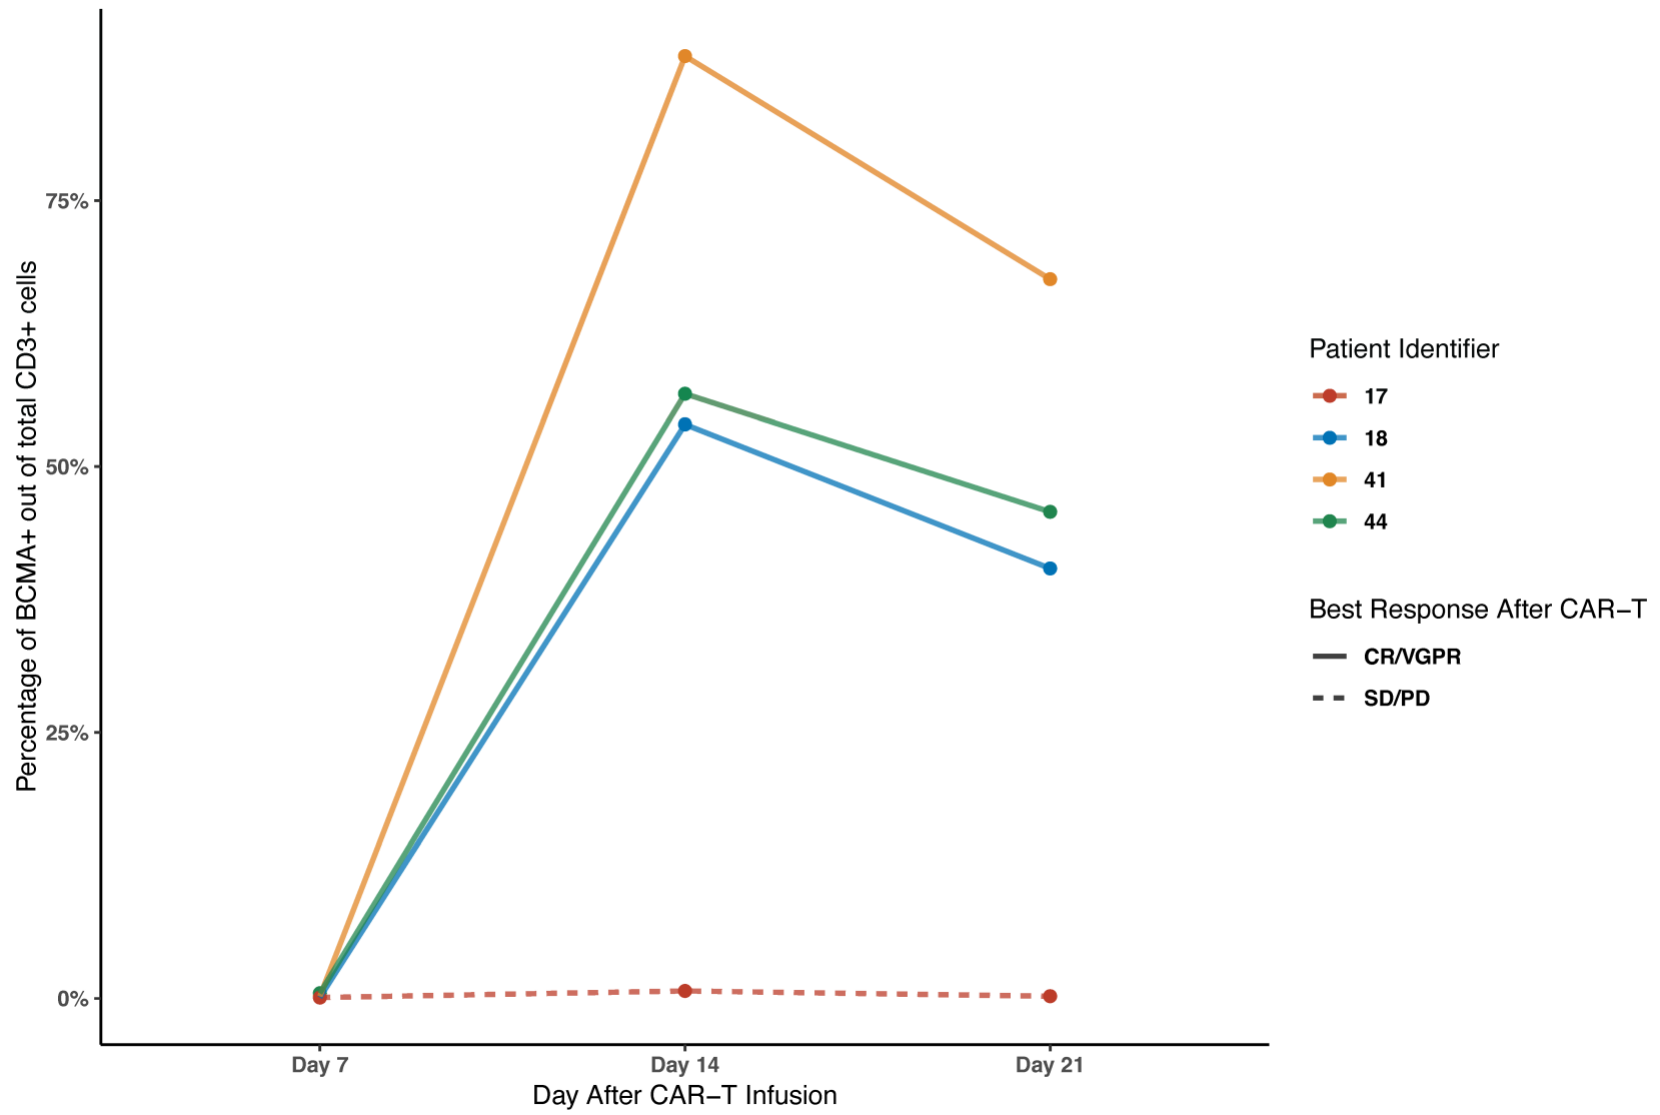

Supplement: BLOODA_ADV-2023-012470-mmc1.pdf [file BLOODA_ADV-2023-012470-mmc1.pdf]
